# Supplementary material for: The past, present, and future viscous heat dissipation available for Greenland subglacial conduit formation
Source: Copernicus journal article supplement (doi:10.5194/tc-11-303-2017), 2017-01-30
Supplement: Supplementary file 1 [file tc-11-303-2017-supplement.zip]

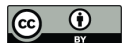

## *Supplement of*

# **The past, present, and future viscous heat dissipation available for Greenland subglacial conduit formation**

**Kenneth D. Mankoff and Slawek M. Tulaczyk**

*Correspondence to:* Kenneth D. Mankoff ([mankoff@psu.edu](mailto:mankoff@psu.edu))

- [tc-11-303-2017-supplement-title-page.pdf](#)
- [VHD.org](#)

The copyright of individual parts of the supplement might differ from the CC-BY 3.0 licence.
